# Supplementary material
Source: Springer Nature journal article supplement (https://www.springermedizin.de/resource/supplementary/13014_2009_182_MOESM5_ESM.pdf/9633086)

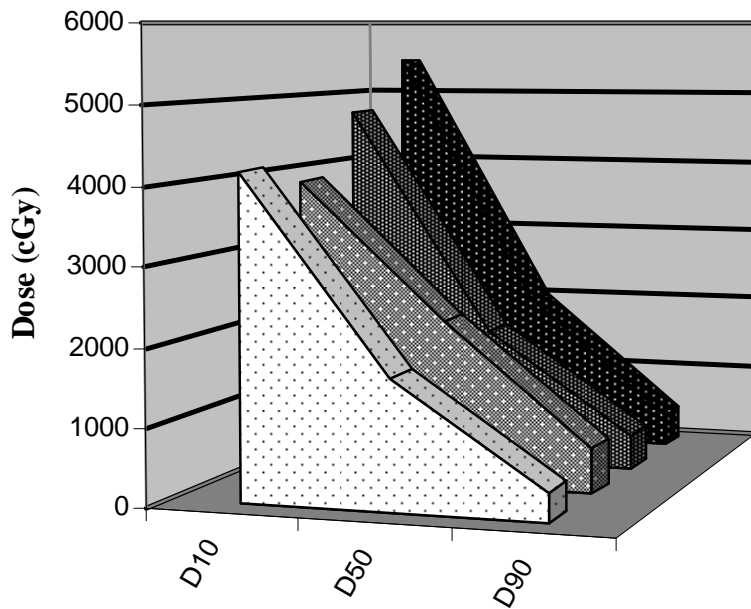

|      | D10  | D50  | D90 |
|------|------|------|-----|
| IB   | 4167 | 1676 | 375 |
| TOMO | 3931 | 2152 | 583 |
| IMRT | 4762 | 1791 | 435 |
| 3D   | 5467 | 2008 | 425 |

Supplement: MOESM5 [file 9633086]
